# Supplementary material for: Density functional investigations on the catalytic cycle of the hydrogenation of aldehydes catalyzed by an enhanced ruthenium complex: an alcohol-bridged autocatalytic process
Source: Royal Society of Chemistry journal article supplement (doi:10.1039/c4ra12466a), 2014-11-11
Supplement: c4ra12466a1.pdf [file c4ra12466a1.pdf]

# Supporting Material for Density Functional Investigations on Catalytic Cycle of Hydrogenation of Aldehydes Catalyzed by an Enhanced Ruthenium Complex: An Alcohol-bridge Participated Autocatalysis Process

Xi Lu,<sup>a</sup> Qian Liu,<sup>a</sup> Xiaoyin Wang,<sup>b</sup> Runjiao Cheng,<sup>b</sup> Mingtao Zhang<sup>b,\*</sup> and Xiaomin Sun<sup>c,\*</sup>

<sup>a</sup>Department of Chemical and Materials Engineering, University of Alberta, Edmonton, AB,

T6G 2V4, Canada, <sup>b</sup>Computational Center for Molecular Science, College of Chemistry,

NanKai University, Tianjin 300071, People's Republic of China, <sup>c</sup>Environment Research

Institute, Shandong University, Jinan, 250100, People's Republic of China.

E-mail: <sup>b,\*</sup> zhangmt@nankai.edu.cn; <sup>c,\*</sup> sxmwch@sdu.edu.cn.

Gaussian 09, Revision B.01,

M. J. Frisch, G. W. Trucks, H. B. Schlegel, G. E. Scuseria, M. A. Robb, J. R. Cheeseman, G. Scalmani, V. Barone, B. Mennucci, G. A. Petersson, H. Nakatsuji, M. Caricato, X. Li, H. P. Hratchian, A. F. Izmaylov, J. Bloino, G. Zheng, J. L. Sonnenberg, M. Hada, M. Ehara, K. Toyota, R. Fukuda, J. Hasegawa, M. Ishida, T. Nakajima, Y. Honda, O. Kitao, H. Nakai, T. Vreven, J. A. Montgomery, Jr., J. E. Peralta, F. Ogliaro, M. Bearpark, J. J. Heyd, E. Brothers, K. N. Kudin, V. N. Staroverov, R. Kobayashi, J. Normand, K. Raghavachari, A. Rendell, J. C. Burant, S. S. Iyengar, J. Tomasi, M. Cossi, N. Rega, J. M. Millam, M. Klene, J. E. Knox, J. B. Cross, V. Bakken, C. Adamo, J. Jaramillo, R. Gomperts, R. E. Stratmann, O. Yazyev, A. J. Austin, R. Cammi, C. Pomelli, J. W. Ochterski, R. L. Martin, K. Morokuma, V. G. Zakrzewski, G. A. Voth, P. Salvador, J. J. Dannenberg, S. Dapprich, A. D. Daniels, O. Farkas, J. B. Foresman, J. V. Ortiz, J. Cioslowski, and D. J. Fox, Gaussian, Inc., Wallingford CT, 2009.

Figure S1. The geometry of **1** optimized at the theory level of B3LYP/LACVP\*

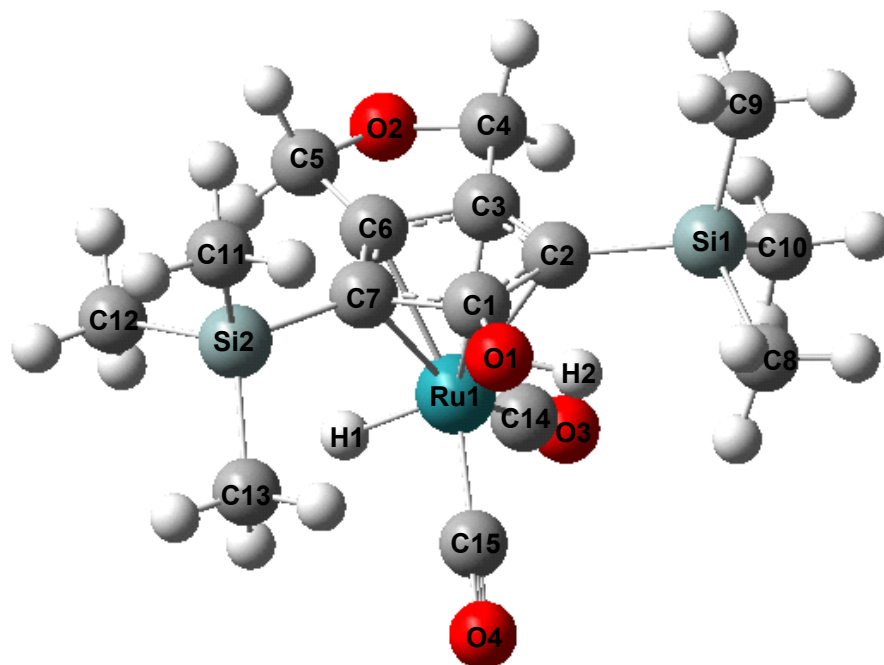

Table S1. Differences of bond lengths between crystal and B3LYP-optimized structure in gas (Å)

| Bonds             | Bond Lengths (Å) |              |
|-------------------|------------------|--------------|
|                   | Crystal (Exp.)   | B3LYP/LACVP* |
| Ru(1)-C(15)       | 1.870            | 1.890        |
| Ru(1)-C(14)       | 1.880            | 1.899        |
| Ru(1)-H(1)        | 1.550            | 1.606        |
| Si(1)-C(2)        | 1.881            | 1.887        |
| Si(2)-C(7)        | 1.873            | 1.889        |
| O(1)-C(1)         | 1.355            | 1.358        |
| O(1)-H(2)         | 0.840            | 0.971        |
| O(2)-C(5)         | 1.455            | 1.434        |
| O(2)-C(4)         | 1.454            | 1.435        |
| O(3)-C(14)        | 1.141            | 1.157        |
| O(4)-C(15)        | 1.145            | 1.156        |
| C(1)-C(7)         | 1.428            | 1.437        |
| C(1)-C(2)         | 1.456            | 1.452        |
| C(2)-C(3)         | 1.445            | 1.445        |
| C(3)-C(6)         | 1.402            | 1.413        |
| C(3)-C(4)         | 1.499            | 1.505        |
| SRE <sup>a</sup>  | 0.0014           |              |
| RMSE <sup>b</sup> | 0.0377           |              |

a. Square Root Error; b. Root Mean Square Error.

**Table S1 B3LYP-calculated energies and thermochemistry in gas at 298 K and 1 atm (Hartree)**

| <b>Complexes</b>                        | $E_{\text{SCF}}$ | $E_{\text{SCF}} + H_{\text{corr}}$ | $E_{\text{SCF}} + G_{\text{corr}}$ |
|-----------------------------------------|------------------|------------------------------------|------------------------------------|
| <b>1</b>                                | -1559.917980     | -1559.529953                       | -1559.620294                       |
| <b>PhCHO</b>                            | -345.5734553     | -345.456003                        | -345.493752                        |
| <b>1/2TS</b>                            | -1559.910933     | -1559.524199                       | -1559.612225                       |
| <b>2</b>                                | -1559.915827     | -1559.527988                       | -1559.61815                        |
| <b>3</b>                                | -1905.497973     | -1904.990068                       | -1905.101692                       |
| <b>3/4TS</b>                            | -1905.476036     | -1904.97437                        | -1905.08142                        |
| <b>4</b>                                | -1905.493638     | -1904.984158                       | -1905.094223                       |
| <b>5</b>                                | -1558.713232     | -1558.345909                       | -1558.435746                       |
| <b>PhCH<sub>2</sub>OH</b>               | -346.7706079     | -346.628934                        | -346.668323                        |
| <b>6</b>                                | -1905.508242     | -1904.996779                       | -1905.105909                       |
| <b>5/7TS</b>                            | -1559.888937     | -1559.507673                       | -1559.605593                       |
| <b>7</b>                                | -1559.897468     | -1559.514326                       | -1559.605967                       |
| <b>7/2TS</b>                            | -1559.845931     | -1559.466251                       | -1559.556237                       |
| <b>6/8TS</b>                            | -1906.665872     | -1906.140327                       | -1906.258850                       |
| <b>8</b>                                | -1906.675437     | -1906.147950                       | -1906.262310                       |
| <b>8/2TS</b>                            | -1906.665031     | -1906.140175                       | -1906.251078                       |
| <b>9</b>                                | -2253.456607     | -2252.784621                       | -2252.921484                       |
| <b>9/2TS</b>                            | -2253.448685     | -2252.779591                       | -2252.913003                       |
| <b>(PhCH<sub>2</sub>OH)<sub>2</sub></b> | -693.5498883     | -693.26414                         | -693.328754                        |
| <b>H<sub>2</sub></b>                    | -1.175482        | -1.162033                          | -1.176825                          |

**Table S2 Single-point energies<sup>a</sup> obtained at the M06/def2-TZVP, 6-31++G\*\* level with SMD solvent model in toluene (Hartree)**

| <b>Complexes</b> | $E(\text{SCF}, \text{M06}) + \Delta G(\text{sol}, \text{M06})$ |
|------------------|----------------------------------------------------------------|
| <b>1</b>         | -1560.391912                                                   |
| <b>PhCHO</b>     | -345.358054                                                    |
| <b>1/2TS</b>     | -1560.384413                                                   |

|                                         |              |
|-----------------------------------------|--------------|
| <b>2</b>                                | -1560.390021 |
| <b>3</b>                                | -1905.751896 |
| <b>3/4TS</b>                            | -1905.736505 |
| <b>4</b>                                | -1905.756529 |
| <b>5</b>                                | -1559.183886 |
| <b>PhCH<sub>2</sub>OH</b>               | -346.5593995 |
| <b>6</b>                                | -1905.767631 |
| <b>5/7TS</b>                            | -1560.355709 |
| <b>7</b>                                | -1560.372515 |
| <b>7/2TS</b>                            | -1560.323131 |
| <b>6/8TS</b>                            | -1906.917118 |
| <b>8</b>                                | -1906.935734 |
| <b>8/2TS</b>                            | -1906.919762 |
| <b>9</b>                                | -2253.499496 |
| <b>9/2TS</b>                            | -2253.484773 |
| <b>(PhCH<sub>2</sub>OH)<sub>2</sub></b> | -693.1260313 |
| <b>H<sub>2</sub></b>                    | -1.168928    |

---

a. single-point calculations were performed at the B3LYP-optimized structures

---

## Cartesian Coordinates of B3LYP-Optimized Structures in Gas

1

|    |             |             |             |
|----|-------------|-------------|-------------|
| C  | 0.18338500  | 1.24395200  | -0.09249000 |
| O  | 0.38574000  | 2.24261800  | -0.98951300 |
| H  | -0.45300800 | 2.46034000  | -1.42678800 |
| C  | -1.08568500 | 0.80101900  | 0.42821400  |
| C  | -0.70765000 | -0.20592600 | 1.39569600  |
| C  | -1.29536400 | -0.99642300 | 2.53552700  |
| H  | -2.13188200 | -1.65131000 | 2.27811500  |
| H  | -1.62364100 | -0.31632400 | 3.34175700  |
| C  | 1.04594700  | -1.23169500 | 2.60743800  |
| H  | 1.45103400  | -0.63148500 | 3.44104000  |
| H  | 1.74544500  | -2.04106700 | 2.39115200  |
| C  | 0.69713900  | -0.34524000 | 1.44217400  |
| C  | 1.30800700  | 0.53293200  | 0.47497400  |
| Si | -2.81042500 | 1.46915800  | 0.07313800  |
| C  | -3.24299400 | 2.78815700  | 1.36276200  |
| H  | -3.24590000 | 2.36937700  | 2.37633800  |
| H  | -4.23749300 | 3.21318300  | 1.17791300  |
| H  | -2.52012900 | 3.61266300  | 1.34970700  |
| C  | -4.06950000 | 0.06277000  | 0.14752400  |
| H  | -4.07348800 | -0.42913100 | 1.12746100  |
| H  | -3.86227600 | -0.70300100 | -0.60805800 |
| H  | -5.08258500 | 0.44530300  | -0.02810300 |
| C  | -2.85448800 | 2.26694600  | -1.65283100 |
| H  | -2.45298400 | 1.60421900  | -2.42934500 |
| H  | -2.32972500 | 3.23143100  | -1.70316600 |
| H  | -3.89540600 | 2.48167900  | -1.92520400 |
| Si | 3.14011900  | 0.87172400  | 0.14628400  |
| C  | 3.56217100  | 2.56821800  | 0.87790200  |
| H  | 4.62033700  | 2.81347600  | 0.72320000  |
| H  | 3.36733300  | 2.60248200  | 1.95659900  |
| H  | 2.96379100  | 3.35576300  | 0.40524000  |
| C  | 4.15208800  | -0.47373800 | 1.01032700  |
| H  | 5.22145800  | -0.32961800 | 0.81230600  |
| H  | 3.88073400  | -1.47240400 | 0.64908400  |
| H  | 4.01827700  | -0.45745600 | 2.09873700  |
| C  | 3.49350200  | 0.87116700  | -1.70834200 |
| H  | 4.53809200  | 1.14089900  | -1.90797100 |
| H  | 2.85285300  | 1.59151500  | -2.22836200 |
| H  | 3.31067400  | -0.11743200 | -2.14373200 |
| C  | 0.30299200  | -1.02857100 | -2.47939700 |

|    |             |             |             |
|----|-------------|-------------|-------------|
| O  | 0.49965600  | -0.98277600 | -3.61767100 |
| C  | -1.19298000 | -2.52871800 | -0.74184100 |
| O  | -1.93749800 | -3.41231100 | -0.79196300 |
| H  | 1.15541200  | -2.20624000 | -0.58716100 |
| O  | -0.21054100 | -1.82073400 | 2.97963900  |
| Ru | 0.01111600  | -1.07960700 | -0.60232800 |

### PhCHO

|   |             |             |            |
|---|-------------|-------------|------------|
| C | 0.59218900  | -2.15091100 | 0.00000000 |
| C | 1.63048500  | -1.21642100 | 0.00000000 |
| C | 1.33341900  | 0.14576600  | 0.00000000 |
| C | 0.00000000  | 0.57513200  | 0.00000000 |
| C | -1.03935100 | -0.36820200 | 0.00000000 |
| C | -0.74227800 | -1.72682800 | 0.00000000 |
| H | 0.82147000  | -3.21326300 | 0.00000000 |
| H | 2.66433800  | -1.54997000 | 0.00000000 |
| H | 2.13351300  | 0.88330000  | 0.00000000 |
| H | -2.06440700 | -0.01012700 | 0.00000000 |
| H | -1.54419800 | -2.45988100 | 0.00000000 |
| C | -0.30611100 | 2.02370700  | 0.00000000 |
| H | 0.58997000  | 2.68483600  | 0.00000000 |
| O | -1.42635100 | 2.49645600  | 0.00000000 |

### 1/2TS

|    |             |             |             |
|----|-------------|-------------|-------------|
| C  | -0.03957400 | -1.27240700 | -0.22234800 |
| O  | -0.03956100 | -2.30158900 | -1.12229000 |
| H  | 0.79908400  | -2.30481500 | -1.60875100 |
| C  | 1.11620500  | -0.71917100 | 0.45993300  |
| C  | 0.55858500  | 0.18476900  | 1.41928700  |
| C  | 0.93322900  | 1.01801200  | 2.61584100  |
| H  | 1.71671400  | 1.76076100  | 2.44739000  |
| H  | 1.23854600  | 0.37616300  | 3.46125300  |
| C  | -1.41597500 | 1.00670000  | 2.43649900  |
| H  | -1.83541600 | 0.35102900  | 3.21935400  |
| H  | -2.17720900 | 1.73922900  | 2.15968300  |
| C  | -0.86062100 | 0.17863000  | 1.30754500  |
| C  | -1.27858800 | -0.73203400 | 0.28563300  |
| Si | 2.93252200  | -1.22259100 | 0.28020400  |
| C  | 3.27534800  | -2.59580900 | 1.53733100  |
| H  | 3.10501400  | -2.25093400 | 2.56418000  |
| H  | 4.31514900  | -2.93946900 | 1.47164500  |
| H  | 2.62576100  | -3.46267000 | 1.36801600  |
| C  | 4.04040900  | 0.26905900  | 0.61701600  |

|    |              |              |              |
|----|--------------|--------------|--------------|
| H  | 3. 87808300  | 0. 68060000  | 1. 61995900  |
| H  | 3. 86417000  | 1. 07147400  | -0. 10762000 |
| H  | 5. 09715800  | -0. 01758800 | 0. 54923300  |
| C  | 3. 27227600  | -1. 88221400 | -1. 46782000 |
| H  | 2. 96337000  | -1. 17922200 | -2. 25064000 |
| H  | 2. 80377800  | -2. 85678300 | -1. 65968000 |
| H  | 4. 35166100  | -2. 03750400 | -1. 58948000 |
| Si | -3. 02876300 | -1. 25646500 | -0. 21525100 |
| C  | -3. 35589800 | -2. 95005600 | 0. 56984600  |
| H  | -4. 36531300 | -3. 30721200 | 0. 33036100  |
| H  | -3. 26636800 | -2. 91486000 | 1. 66225000  |
| H  | -2. 64174800 | -3. 69508900 | 0. 20011300  |
| C  | -4. 24543500 | 0. 01959700  | 0. 47443800  |
| H  | -5. 27195500 | -0. 24545500 | 0. 19256000  |
| H  | -4. 04343200 | 1. 02125100  | 0. 07719300  |
| H  | -4. 21438900 | 0. 07529800  | 1. 56924500  |
| C  | -3. 19731900 | -1. 37701200 | -2. 09038100 |
| H  | -4. 19008000 | -1. 75315700 | -2. 36783100 |
| H  | -2. 44597000 | -2. 05676100 | -2. 50523200 |
| H  | -3. 05885300 | -0. 39736000 | -2. 56042900 |
| C  | 1. 31298700  | 1. 47952400  | -1. 92157200 |
| O  | 2. 16221700  | 1. 72755100  | -2. 67091000 |
| C  | -0. 59152300 | 2. 82086500  | -0. 51730900 |
| O  | -0. 96634000 | 3. 90754300  | -0. 39736200 |
| H  | -0. 96619500 | 0. 96132900  | -1. 98847600 |
| Ru | -0. 02541800 | 1. 02176500  | -0. 68538500 |
| O  | -0. 27636900 | 1. 72151600  | 2. 93676900  |

## 2

|    |              |              |              |
|----|--------------|--------------|--------------|
| C  | 0. 00479500  | 1. 29409600  | -0. 28633900 |
| O  | 0. 08664500  | 2. 24013600  | -1. 25884700 |
| H  | -0. 72248100 | 2. 22316300  | -1. 79450000 |
| C  | -1. 20780700 | 0. 74544800  | 0. 27847600  |
| C  | -0. 72523500 | -0. 09369800 | 1. 36163200  |
| C  | -1. 22338100 | -0. 83479900 | 2. 57356200  |
| H  | -1. 98088400 | -1. 59927000 | 2. 38192600  |
| H  | -1. 62792600 | -0. 12850500 | 3. 32041900  |
| C  | 1. 13373700  | -0. 82129300 | 2. 62161300  |
| H  | 1. 50016000  | -0. 11361700 | 3. 38612800  |
| H  | 1. 90510000  | -1. 57816500 | 2. 45987100  |
| C  | 0. 67781100  | -0. 08392500 | 1. 39166300  |
| C  | 1. 19000800  | 0. 75659700  | 0. 32456100  |
| Si | -2. 98813700 | 1. 23702000  | -0. 11106600 |

|    |             |             |             |
|----|-------------|-------------|-------------|
| C  | -3.42784500 | 2.78103300  | 0.89471600  |
| H  | -3.34940100 | 2.59254400  | 1.97214300  |
| H  | -4.45539400 | 3.10641300  | 0.68950600  |
| H  | -2.76020100 | 3.61783800  | 0.65715600  |
| C  | -4.15225300 | -0.17839600 | 0.34871400  |
| H  | -4.10120500 | -0.41627600 | 1.41794700  |
| H  | -3.92812700 | -1.09378800 | -0.20943700 |
| H  | -5.19013700 | 0.10094100  | 0.12868800  |
| C  | -3.16030100 | 1.63455300  | -1.96037200 |
| H  | -2.72854300 | 0.84755500  | -2.58968800 |
| H  | -2.71093800 | 2.59681700  | -2.24292300 |
| H  | -4.22322100 | 1.71369200  | -2.22061700 |
| Si | 2.97583700  | 1.25246900  | -0.06846500 |
| C  | 3.24887500  | 3.01200200  | 0.57880200  |
| H  | 4.27477900  | 3.34910700  | 0.38463900  |
| H  | 3.07833900  | 3.07420200  | 1.66037100  |
| H  | 2.56698600  | 3.71883500  | 0.09205400  |
| C  | 4.13147800  | 0.05374500  | 0.83334400  |
| H  | 5.17715700  | 0.30389000  | 0.61512700  |
| H  | 3.97171400  | -0.98389900 | 0.51795500  |
| H  | 4.00801000  | 0.10073600  | 1.92210200  |
| C  | 3.28217000  | 1.18855800  | -1.92928200 |
| H  | 4.28824700  | 1.55198700  | -2.17296700 |
| H  | 2.55533700  | 1.81045900  | -2.46172300 |
| H  | 3.18983200  | 0.16580000  | -2.31126200 |
| C  | -1.29642500 | -2.36853200 | -0.92091800 |
| O  | -2.11991900 | -3.16113900 | -1.10097300 |
| C  | 1.41964100  | -2.22197400 | -1.01181100 |
| O  | 2.31658400  | -2.91412000 | -1.24526000 |
| H  | -0.05302500 | -0.79226800 | -2.21946800 |
| O  | -0.05188700 | -1.48783700 | 3.08198600  |
| Ru | 0.00602300  | -1.03676900 | -0.61989700 |

### 3

|   |             |             |             |
|---|-------------|-------------|-------------|
| C | -0.82213300 | 0.06976000  | -1.21430300 |
| O | 0.16331200  | -0.26915700 | -2.06997300 |
| H | 1.00546700  | 0.22175000  | -1.90790400 |
| C | -1.79978300 | -0.91183800 | -0.80623000 |
| C | -2.77208700 | -0.15206500 | -0.04793900 |
| C | -4.15544000 | -0.26979300 | 0.53121600  |
| H | -4.29960500 | -1.08117500 | 1.24892400  |
| H | -4.90467300 | -0.38308500 | -0.27249500 |
| C | -3.46623900 | 1.97728800  | 0.69490000  |



|    |             |             |             |
|----|-------------|-------------|-------------|
| H  | -3.99137200 | 2.59411200  | -0.05460000 |
| H  | -3.16592600 | 2.62777300  | 1.52042800  |
| C  | -2.35813100 | 1.18661600  | 0.04907900  |
| C  | -1.09825200 | 1.37697300  | -0.65163100 |
| Si | -1.87666900 | -2.70638600 | -1.39549400 |
| C  | -2.40413300 | -2.70842600 | -3.21518900 |
| H  | -3.38791700 | -2.24297000 | -3.35025200 |
| H  | -2.46232700 | -3.73053600 | -3.60980600 |
| H  | -1.68473200 | -2.15192300 | -3.82681300 |
| C  | -3.16694500 | -3.62317000 | -0.35427400 |
| H  | -4.16747600 | -3.18574100 | -0.45664900 |
| H  | -2.90593800 | -3.62496300 | 0.71047800  |
| H  | -3.23688200 | -4.66965200 | -0.67641700 |
| C  | -0.19404200 | -3.54904900 | -1.22142000 |
| H  | 0.12408100  | -3.58582800 | -0.17338600 |
| H  | 0.56606700  | -3.00401800 | -1.79060800 |
| H  | -0.23141500 | -4.57822300 | -1.60011600 |
| Si | -0.25261800 | 3.03303300  | -1.03447700 |
| C  | 0.12193600  | 3.09698900  | -2.89027100 |
| H  | 0.57873100  | 4.05914900  | -3.15360400 |
| H  | -0.79279800 | 2.98759500  | -3.48490800 |
| H  | 0.81379100  | 2.30675300  | -3.20018400 |
| C  | -1.47112700 | 4.41894900  | -0.60266600 |
| H  | -1.03092900 | 5.38979100  | -0.86248700 |
| H  | -1.70432700 | 4.44735500  | 0.46825800  |
| H  | -2.41509800 | 4.32988200  | -1.15286900 |
| C  | 1.33735300  | 3.30075000  | -0.04913900 |
| H  | 1.76166800  | 4.28587800  | -0.28334300 |
| H  | 2.09184500  | 2.54546500  | -0.28976200 |
| H  | 1.15216800  | 3.26424300  | 1.03019800  |
| C  | -1.01909600 | -1.57490200 | 2.30624400  |
| O  | -1.16967000 | -2.50239500 | 2.98307800  |
| C  | -0.29527100 | 1.04705800  | 2.55505400  |
| O  | 0.01085500  | 1.78689100  | 3.39078600  |
| H  | 0.76775300  | -0.53845200 | 1.10125900  |
| O  | -4.34527200 | 0.97337100  | 1.22255900  |
| Ru | -0.79602200 | -0.10708500 | 1.14871100  |
| C  | 7.02104200  | -0.80229800 | 0.77623000  |
| C  | 6.07372500  | -1.80111800 | 1.01583800  |
| C  | 4.79391900  | -1.68127400 | 0.47781100  |
| C  | 4.46027300  | -0.56053500 | -0.29821900 |
| C  | 5.41714800  | 0.44151700  | -0.53516300 |
| C  | 6.69347800  | 0.31787500  | 0.00123600  |

|   |             |              |              |
|---|-------------|--------------|--------------|
| H | 8. 01960700 | -0. 89463900 | 1. 19482700  |
| H | 6. 33292700 | -2. 66615500 | 1. 61904500  |
| H | 4. 04650400 | -2. 45029600 | 0. 65873600  |
| H | 5. 13764900 | 1. 29964400  | -1. 13826300 |
| H | 7. 43697000 | 1. 08894200  | -0. 17906900 |
| C | 3. 10642100 | -0. 45252300 | -0. 85329300 |
| H | 2. 42618000 | -1. 29513300 | -0. 63554800 |
| O | 2. 70818800 | 0. 49784300  | -1. 52444800 |

### 3/4TS

|    |              |              |              |
|----|--------------|--------------|--------------|
| C  | -1. 15409700 | 0. 38015700  | 1. 19333100  |
| O  | -0. 60614000 | 0. 19465000  | 2. 36890500  |
| H  | 0. 44519500  | -0. 23222500 | 2. 35671300  |
| C  | -1. 00368600 | 1. 58866100  | 0. 38358100  |
| C  | -1. 81877700 | 1. 34897900  | -0. 77772700 |
| C  | -2. 43051200 | 2. 06784000  | -1. 94981200 |
| H  | -1. 72731100 | 2. 58120300  | -2. 60930500 |
| H  | -3. 17465700 | 2. 80373900  | -1. 59779600 |
| C  | -3. 36887400 | -0. 08594400 | -1. 84728200 |
| H  | -4. 40216800 | -0. 01385100 | -1. 46461900 |
| H  | -3. 28537800 | -1. 00103000 | -2. 43777000 |
| C  | -2. 38760600 | 0. 04904100  | -0. 71430500 |
| C  | -1. 96166900 | -0. 61775100 | 0. 48610200  |
| Si | -0. 15218500 | 3. 18283200  | 0. 95727000  |
| C  | -1. 09524500 | 3. 80809900  | 2. 47376200  |
| H  | -2. 14369400 | 4. 02733500  | 2. 23838500  |
| H  | -0. 64263800 | 4. 72615700  | 2. 86846100  |
| H  | -1. 08014500 | 3. 05390700  | 3. 26844900  |
| C  | -0. 26514100 | 4. 44605800  | -0. 45085700 |
| H  | -1. 30282300 | 4. 67509900  | -0. 72224200 |
| H  | 0. 25351900  | 4. 09964500  | -1. 35302100 |
| H  | 0. 20605900  | 5. 38940500  | -0. 14799800 |
| C  | 1. 65483800  | 2. 86823200  | 1. 39740600  |
| H  | 2. 25652200  | 2. 67064000  | 0. 50253800  |
| H  | 1. 74819800  | 2. 00140300  | 2. 05920400  |
| H  | 2. 08563900  | 3. 73976100  | 1. 90614500  |
| Si | -2. 53753800 | -2. 26508700 | 1. 22264100  |
| C  | -3. 66972100 | -1. 86943200 | 2. 68547700  |
| H  | -4. 02704700 | -2. 78765700 | 3. 16790300  |
| H  | -4. 54840000 | -1. 29228600 | 2. 37346100  |
| H  | -3. 13097800 | -1. 28050100 | 3. 43629400  |
| C  | -3. 49338000 | -3. 20938500 | -0. 11325200 |
| H  | -3. 84152100 | -4. 17160500 | 0. 28238800  |

|    |              |              |              |
|----|--------------|--------------|--------------|
| H  | -2. 86848100 | -3. 42453200 | -0. 98850800 |
| H  | -4. 37950100 | -2. 66171800 | -0. 45644000 |
| C  | -1. 07675800 | -3. 31154500 | 1. 80744900  |
| H  | -1. 43492500 | -4. 20168000 | 2. 33978400  |
| H  | -0. 43097800 | -2. 75072700 | 2. 49151800  |
| H  | -0. 46866100 | -3. 65617200 | 0. 96242700  |
| C  | 1. 09313900  | 0. 77439900  | -1. 97391700 |
| O  | 1. 80234800  | 1. 39902500  | -2. 63716300 |
| C  | -0. 04439300 | -1. 73524900 | -1. 92930600 |
| O  | -0. 05189900 | -2. 70009600 | -2. 56615700 |
| H  | 1. 20815300  | -0. 72140900 | 0. 07073200  |
| C  | 1. 96969300  | -1. 24723600 | 1. 17678000  |
| H  | 1. 54785300  | -2. 25696300 | 1. 05283700  |
| O  | 1. 66055300  | -0. 59623800 | 2. 24737900  |
| C  | 3. 34718000  | -1. 10352700 | 0. 61047300  |
| C  | 3. 79417000  | -2. 00666900 | -0. 36406100 |
| C  | 4. 20837700  | -0. 09887700 | 1. 06909800  |
| C  | 5. 08389000  | -1. 90300800 | -0. 88123200 |
| H  | 3. 12709100  | -2. 79080200 | -0. 71729200 |
| C  | 5. 49876000  | 0. 00344500  | 0. 55103000  |
| H  | 3. 85697600  | 0. 58312700  | 1. 83550900  |
| C  | 5. 93843800  | -0. 89463500 | -0. 42549200 |
| H  | 5. 42401700  | -2. 60747300 | -1. 63531000 |
| H  | 6. 16516200  | 0. 78221000  | 0. 91215800  |
| H  | 6. 94476900  | -0. 81256900 | -0. 82729500 |
| Ru | -0. 12566300 | -0. 16847400 | -0. 85945100 |
| O  | -3. 06814700 | 1. 02567000  | -2. 70217900 |

#### 4

|    |              |              |              |
|----|--------------|--------------|--------------|
| C  | -1. 23386200 | 0. 33095900  | 1. 30303000  |
| O  | -0. 70574700 | 0. 19646000  | 2. 42536700  |
| H  | 1. 01183900  | -0. 18941500 | 2. 45934300  |
| C  | -1. 13589200 | 1. 54091700  | 0. 42160200  |
| C  | -1. 93282800 | 1. 23729600  | -0. 71589600 |
| C  | -2. 61217700 | 1. 89507900  | -1. 88671200 |
| H  | -1. 96160600 | 2. 47328300  | -2. 54584400 |
| H  | -3. 41712900 | 2. 55753300  | -1. 52388700 |
| C  | -3. 37171400 | -0. 32380000 | -1. 78316900 |
| H  | -4. 40347800 | -0. 32387500 | -1. 38999000 |
| H  | -3. 22677800 | -1. 23206700 | -2. 37132800 |
| C  | -2. 39943100 | -0. 12284400 | -0. 65267900 |
| C  | -1. 92285100 | -0. 75363400 | 0. 52861800  |
| Si | -0. 37683500 | 3. 19186900  | 0. 96542900  |

|    |              |              |              |
|----|--------------|--------------|--------------|
| C  | 1. 48953500  | 3. 03629700  | 1. 19166000  |
| H  | 1. 74800700  | 2. 16547100  | 1. 80285400  |
| H  | 1. 89334200  | 3. 93169100  | 1. 68094400  |
| H  | 1. 99854400  | 2. 92786500  | 0. 22641500  |
| C  | -1. 20763400 | 3. 69053400  | 2. 58971700  |
| H  | -1. 06311900 | 2. 91275100  | 3. 34715000  |
| H  | -2. 28671900 | 3. 83978100  | 2. 46224100  |
| H  | -0. 78483900 | 4. 62657200  | 2. 97501300  |
| C  | -0. 75026100 | 4. 47886400  | -0. 37639600 |
| H  | -1. 82716900 | 4. 61313700  | -0. 53571400 |
| H  | -0. 29353400 | 4. 21583300  | -1. 33828200 |
| H  | -0. 34282500 | 5. 45429300  | -0. 08271400 |
| Si | -2. 35346800 | -2. 44613500 | 1. 25871300  |
| C  | -3. 52667000 | -2. 14941500 | 2. 71315600  |
| H  | -3. 79790700 | -3. 09359600 | 3. 20153000  |
| H  | -4. 45501700 | -1. 66120800 | 2. 39298800  |
| H  | -3. 04941700 | -1. 50641900 | 3. 46111200  |
| C  | -3. 21223400 | -3. 47833700 | -0. 07813600 |
| H  | -3. 48668800 | -4. 46180600 | 0. 32317500  |
| H  | -2. 56384300 | -3. 65059800 | -0. 94559000 |
| H  | -4. 13612200 | -3. 00628500 | -0. 43403600 |
| C  | -0. 80218500 | -3. 33922600 | 1. 86214000  |
| H  | -1. 07218300 | -4. 26559000 | 2. 38424600  |
| H  | -0. 23929500 | -2. 71221100 | 2. 56172800  |
| H  | -0. 13987000 | -3. 60907900 | 1. 03095900  |
| C  | 0. 86251400  | 0. 93078000  | -2. 06583900 |
| O  | 1. 41130600  | 1. 63536800  | -2. 79635900 |
| C  | -0. 03838200 | -1. 68991100 | -1. 96161200 |
| O  | -0. 05358700 | -2. 63240100 | -2. 62934000 |
| H  | 1. 45253600  | -0. 54609400 | 0. 24443100  |
| C  | 2. 12708000  | -0. 99285300 | 1. 06948800  |
| O  | 1. 97284700  | -0. 29289300 | 2. 25680400  |
| C  | 3. 54165600  | -0. 92410100 | 0. 54782500  |
| C  | 3. 95171400  | -1. 81688300 | -0. 45147100 |
| C  | 4. 44892500  | 0. 02426800  | 1. 03126600  |
| C  | 5. 24568800  | -1. 75835600 | -0. 96706700 |
| H  | 3. 25504000  | -2. 56561300 | -0. 82493600 |
| C  | 5. 74670500  | 0. 07876500  | 0. 51822700  |
| H  | 4. 13380100  | 0. 70447100  | 1. 81451200  |
| C  | 6. 14822600  | -0. 80753800 | -0. 48258800 |
| H  | 5. 55139900  | -2. 45778700 | -1. 74064100 |
| H  | 6. 44615700  | 0. 81582000  | 0. 90420300  |
| H  | 7. 15855900  | -0. 76239100 | -0. 88028800 |

|    |              |              |              |
|----|--------------|--------------|--------------|
| H  | 1. 79736600  | -2. 03871800 | 1. 14960700  |
| Ru | -0. 18009400 | -0. 13178600 | -0. 86369000 |
| O  | -3. 15559300 | 0. 80364000  | -2. 64094900 |

**5**

|    |              |              |              |
|----|--------------|--------------|--------------|
| C  | -0. 00004800 | 1. 46408400  | -0. 12814200 |
| O  | -0. 00010200 | 2. 41246900  | -0. 91397500 |
| C  | -1. 21848800 | 0. 71652200  | 0. 36525600  |
| C  | -0. 72454700 | -0. 22409700 | 1. 29486800  |
| C  | -1. 17435500 | -1. 12728900 | 2. 40941300  |
| H  | -1. 95783600 | -1. 84065000 | 2. 14534800  |
| H  | -1. 52923200 | -0. 51767400 | 3. 25870700  |
| C  | 1. 17425400  | -1. 12733600 | 2. 40933400  |
| H  | 1. 52917700  | -0. 51763300 | 3. 25855200  |
| H  | 1. 95773100  | -1. 84072700 | 2. 14532300  |
| C  | 0. 72443500  | -0. 22423900 | 1. 29472700  |
| C  | 1. 21838800  | 0. 71637800  | 0. 36505800  |
| Si | -2. 98313600 | 1. 26084800  | -0. 04816300 |
| C  | -3. 24176300 | 2. 97728500  | 0. 70336700  |
| H  | -3. 13866300 | 2. 96185600  | 1. 79508900  |
| H  | -4. 23970000 | 3. 36781800  | 0. 46861000  |
| H  | -2. 50060600 | 3. 67854800  | 0. 30437300  |
| C  | -4. 19805800 | 0. 02056000  | 0. 71127400  |
| H  | -4. 10971300 | -0. 02670900 | 1. 80369700  |
| H  | -4. 05505900 | -0. 99173000 | 0. 31500100  |
| H  | -5. 22991800 | 0. 31591300  | 0. 48384200  |
| C  | -3. 18808900 | 1. 32943400  | -1. 92389100 |
| H  | -3. 09620700 | 0. 33485000  | -2. 37637300 |
| H  | -2. 41947100 | 1. 97451000  | -2. 36279000 |
| H  | -4. 17108800 | 1. 73135200  | -2. 19884400 |
| Si | 2. 98306900  | 1. 26089600  | -0. 04801000 |
| C  | 3. 24160300  | 2. 97707200  | 0. 70415500  |
| H  | 4. 23940800  | 3. 36784600  | 0. 46923000  |
| H  | 3. 13885500  | 2. 96120400  | 1. 79590200  |
| H  | 2. 50023000  | 3. 67838400  | 0. 30565200  |
| C  | 4. 19789500  | 0. 02030700  | 0. 71108900  |
| H  | 5. 22983600  | 0. 31576100  | 0. 48417400  |
| H  | 4. 05499600  | -0. 99176400 | 0. 31421300  |
| H  | 4. 10919400  | -0. 02758200 | 1. 80345600  |
| C  | 3. 18811300  | 1. 33010600  | -1. 92370300 |
| H  | 4. 17116600  | 1. 73197100  | -2. 19853800 |
| H  | 2. 41955100  | 1. 97534400  | -2. 36245500 |
| H  | 3. 09613100  | 0. 33564400  | -2. 37644500 |

|    |             |             |             |
|----|-------------|-------------|-------------|
| C  | -1.38749700 | -2.19411500 | -1.08332600 |
| O  | -2.25953800 | -2.93991800 | -1.21933600 |
| C  | 1.38790300  | -2.19344600 | -1.08356900 |
| O  | 2.26033800  | -2.93875700 | -1.21977700 |
| O  | -0.00005600 | -1.86534700 | 2.77009700  |
| Ru | -0.00003300 | -0.94081500 | -0.68683700 |

### PhCH<sub>2</sub>OH

|   |             |             |             |
|---|-------------|-------------|-------------|
| C | -2.30106700 | -0.28957700 | -0.08630400 |
| C | -1.38690100 | -1.33614400 | 0.05512700  |
| C | -0.02283200 | -1.06624700 | 0.16683500  |
| C | 0.44628100  | 0.25330900  | 0.13460200  |
| C | -0.47585200 | 1.29533500  | -0.01614800 |
| C | -1.84197500 | 1.02823400  | -0.12063600 |
| H | -3.36373200 | -0.50000300 | -0.17343300 |
| H | -1.73746100 | -2.36485200 | 0.08019500  |
| H | 0.69307000  | -1.87625500 | 0.27347800  |
| H | -0.12178200 | 2.32380000  | -0.05452000 |
| H | -2.54579100 | 1.84818100  | -0.23837000 |
| C | 1.92782800  | 0.54382900  | 0.28369500  |
| H | 2.15114000  | 1.54523200  | -0.11854800 |
| H | 2.20784200  | 0.55867400  | 1.34398600  |
| O | 2.76634900  | -0.44774500 | -0.29800900 |
| H | 2.51302800  | -0.52525000 | -1.23174800 |

### 6

|    |             |             |             |
|----|-------------|-------------|-------------|
| Si | -2.12563000 | -2.74681400 | -0.93118400 |
| Si | -1.23196800 | 3.14615200  | -0.91925300 |
| O  | -1.28524100 | 0.13802400  | -2.36310100 |
| O  | 1.23773600  | -0.01820700 | -1.39341200 |
| H  | 0.48412400  | -0.02160500 | -2.04290500 |
| O  | 1.75217600  | 1.93867500  | 2.21946100  |
| O  | 1.13683700  | -2.52562600 | 2.05444200  |
| C  | -1.59125600 | 0.18110200  | -1.14553200 |
| C  | -1.84013600 | -1.00146500 | -0.27013900 |
| C  | -2.06548400 | -0.47001400 | 1.03855300  |
| C  | -2.64207900 | -0.84814800 | 2.37719900  |
| H  | -2.18008700 | -1.70896900 | 2.86469700  |
| H  | -3.72408400 | -1.04458900 | 2.27606400  |
| C  | -2.31489400 | 1.47483800  | 2.37402900  |
| H  | -3.29987800 | 1.96390300  | 2.27326400  |
| H  | -1.63040400 | 2.17553800  | 2.85645000  |
| C  | -1.87230400 | 0.94875600  | 1.03470900  |

|    |             |             |             |
|----|-------------|-------------|-------------|
| C  | -1.49495600 | 1.39184600  | -0.26771000 |
| C  | -0.61175100 | -3.38606400 | -1.86785100 |
| H  | 0.24705700  | -3.52285400 | -1.19996700 |
| H  | -0.32783400 | -2.68541300 | -2.66036800 |
| H  | -0.82688000 | -4.35455600 | -2.33630100 |
| C  | -3.60744400 | -2.67945600 | -2.10613700 |
| H  | -3.41285300 | -1.96615400 | -2.91486300 |
| H  | -4.51979800 | -2.35931900 | -1.58855600 |
| H  | -3.80570100 | -3.65991800 | -2.55674600 |
| C  | -2.49559700 | -3.89800800 | 0.52842700  |
| H  | -2.67842500 | -4.91829000 | 0.16889800  |
| H  | -3.38906200 | -3.58523200 | 1.08236900  |
| H  | -1.65858000 | -3.94679400 | 1.23543100  |
| C  | -2.75700800 | 3.62000600  | -1.93678600 |
| H  | -2.65497600 | 4.62836900  | -2.35712700 |
| H  | -3.67005300 | 3.60347900  | -1.32939600 |
| H  | -2.89532200 | 2.92045200  | -2.76899900 |
| C  | 0.31154700  | 3.24737800  | -2.00311700 |
| H  | 0.22917200  | 2.55893900  | -2.85020200 |
| H  | 1.21563200  | 2.98475800  | -1.44277000 |
| H  | 0.43701100  | 4.26336400  | -2.39797900 |
| C  | -1.05933800 | 4.31861700  | 0.56143100  |
| H  | -0.90521400 | 5.34752600  | 0.21287600  |
| H  | -0.20379800 | 4.05764100  | 1.19581000  |
| H  | -1.95789400 | 4.32275400  | 1.19068600  |
| C  | 2.31043200  | -0.87148500 | -1.84114300 |
| H  | 2.49001300  | -0.63980700 | -2.89956000 |
| H  | 2.01460800  | -1.92431300 | -1.76718300 |
| C  | 3.54952100  | -0.60872200 | -1.02565300 |
| C  | 4.11533100  | 0.67429700  | -0.99380100 |
| H  | 3.64788200  | 1.47796500  | -1.55696700 |
| C  | 5.26240800  | 0.92226700  | -0.24214700 |
| H  | 5.69066400  | 1.92080900  | -0.22243100 |
| C  | 5.86384500  | -0.11204300 | 0.48210100  |
| H  | 6.75934900  | 0.08164200  | 1.06633800  |
| C  | 5.31044500  | -1.39227000 | 0.45236700  |
| H  | 5.77093600  | -2.20007100 | 1.01454700  |
| C  | 4.15583700  | -1.63658000 | -0.29576100 |
| H  | 3.72297500  | -2.63420600 | -0.31170800 |
| C  | 1.17534900  | 1.16136900  | 1.58857300  |
| C  | 0.80150500  | -1.57154100 | 1.49298400  |
| O  | -2.41202900 | 0.30524900  | 3.19725000  |
| Ru | 0.08132100  | -0.05042700 | 0.59881900  |

**5/7TS**

|    |             |             |             |
|----|-------------|-------------|-------------|
| C  | -0.00297100 | 1.46688200  | -0.10844300 |
| O  | -0.00012000 | 2.41005400  | -0.90042200 |
| H  | 0.12295000  | -0.54890600 | -4.38319800 |
| C  | -1.22244700 | 0.72194500  | 0.38586700  |
| C  | -0.73148200 | -0.21012100 | 1.32647400  |
| C  | -1.18511500 | -1.10170500 | 2.44894800  |
| H  | -1.96823600 | -1.81733800 | 2.19029000  |
| H  | -1.54164500 | -0.48318500 | 3.29111300  |
| C  | 1.16310800  | -1.10065500 | 2.45778800  |
| H  | 1.51301900  | -0.48211200 | 3.30270100  |
| H  | 1.94867200  | -1.81558400 | 2.20457100  |
| C  | 0.71697600  | -0.20918900 | 1.33221400  |
| C  | 1.21385900  | 0.72305700  | 0.39511400  |
| Si | -2.98690500 | 1.26466500  | -0.02981100 |
| C  | -3.24468800 | 2.98421800  | 0.71521600  |
| H  | -3.14151800 | 2.97290900  | 1.80698600  |
| H  | -4.24240900 | 3.37446600  | 0.47905200  |
| H  | -2.50315000 | 3.68357500  | 0.31355700  |
| C  | -4.20180200 | 0.02807900  | 0.73597000  |
| H  | -4.11338200 | -0.01377500 | 1.82860700  |
| H  | -4.05881300 | -0.98619600 | 0.34476400  |
| H  | -5.23371100 | 0.32224700  | 0.50722500  |
| C  | -3.19645800 | 1.32662200  | -1.90508000 |
| H  | -3.10286200 | 0.33092000  | -2.35454600 |
| H  | -2.43106100 | 1.97250800  | -2.34825400 |
| H  | -4.18145600 | 1.72485100  | -2.17830000 |
| Si | 2.97978100  | 1.26749700  | -0.01110700 |
| C  | 3.23452100  | 2.98526600  | 0.73897300  |
| H  | 4.23315400  | 3.37606400  | 0.50763900  |
| H  | 3.12715100  | 2.97118800  | 1.83030200  |
| H  | 2.49455500  | 3.68566300  | 0.33624300  |
| C  | 4.19301300  | 0.02970000  | 0.75507100  |
| H  | 5.22550700  | 0.32578400  | 0.53150100  |
| H  | 4.05271900  | -0.98353100 | 0.36027500  |
| H  | 4.10015600  | -0.01560900 | 1.84721000  |
| C  | 3.19322500  | 1.33533600  | -1.88603700 |
| H  | 4.17782300  | 1.73586000  | -2.15722300 |
| H  | 2.42727000  | 1.98230500  | -2.32695200 |
| H  | 3.10163500  | 0.34083900  | -2.33863900 |
| C  | -1.38520500 | -2.20755900 | -1.02543600 |
| O  | -2.25639300 | -2.95570400 | -1.15368200 |



|    |              |              |              |
|----|--------------|--------------|--------------|
| C  | 1. 38937000  | -2. 20991600 | -1. 00891300 |
| O  | 2. 26032400  | -2. 96022400 | -1. 12567800 |
| H  | 0. 51026500  | -0. 02394700 | -4. 02658100 |
| Ru | 0. 00103400  | -0. 94797800 | -0. 64240000 |
| O  | -0. 01203800 | -1. 83662600 | 2. 82024900  |

7

|    |              |              |              |
|----|--------------|--------------|--------------|
| C  | 0. 00011000  | 1. 52925400  | -0. 06709600 |
| O  | 0. 00001800  | 2. 59600000  | -0. 67270200 |
| H  | -0. 39631600 | -0. 29255400 | -2. 51842700 |
| C  | -1. 21016600 | 0. 70412200  | 0. 32116600  |
| C  | -0. 71820500 | -0. 26294200 | 1. 24473400  |
| C  | -1. 17250300 | -1. 15985900 | 2. 36571400  |
| H  | -1. 96174500 | -1. 87082200 | 2. 11308900  |
| H  | -1. 51667600 | -0. 54304200 | 3. 21418700  |
| C  | 1. 17344400  | -1. 15980300 | 2. 36531300  |
| H  | 1. 51787800  | -0. 54297000 | 3. 21366100  |
| H  | 1. 96263600  | -1. 87072300 | 2. 11242300  |
| C  | 0. 71876900  | -0. 26284400 | 1. 24451600  |
| C  | 1. 21044400  | 0. 70418400  | 0. 32078000  |
| Si | -2. 97341700 | 1. 29065200  | -0. 03111400 |
| C  | -3. 24592700 | 2. 89894100  | 0. 92895300  |
| H  | -3. 17166300 | 2. 74402800  | 2. 01218300  |
| H  | -4. 23652700 | 3. 32177800  | 0. 72043000  |
| H  | -2. 49222700 | 3. 64017000  | 0. 64135100  |
| C  | -4. 20225100 | -0. 02870700 | 0. 55433600  |
| H  | -4. 13281200 | -0. 20138600 | 1. 63550600  |
| H  | -4. 05404800 | -0. 99035300 | 0. 04931500  |
| H  | -5. 22978500 | 0. 29440900  | 0. 34544200  |
| C  | -3. 16518200 | 1. 60875600  | -1. 88285100 |
| H  | -3. 10495800 | 0. 68060800  | -2. 46370800 |
| H  | -2. 37192900 | 2. 28114100  | -2. 22742600 |
| H  | -4. 13105200 | 2. 07913400  | -2. 10438400 |
| Si | 2. 97365100  | 1. 29057300  | -0. 03186800 |
| C  | 3. 24649000  | 2. 89890900  | 0. 92802700  |
| H  | 4. 23698000  | 3. 32177400  | 0. 71903700  |
| H  | 3. 17272500  | 2. 74403100  | 2. 01129600  |
| H  | 2. 49264100  | 3. 64010900  | 0. 64074100  |
| C  | 4. 20237300  | -0. 02892400 | 0. 55354500  |
| H  | 5. 22998500  | 0. 29415200  | 0. 34498700  |
| H  | 4. 05420600  | -0. 99042700 | 0. 04823500  |
| H  | 4. 13267300  | -0. 20190000 | 1. 63465100  |
| C  | 3. 16525500  | 1. 60841200  | -1. 88365800 |

|    |              |              |              |
|----|--------------|--------------|--------------|
| H  | 4. 13138400  | 2. 07812200  | -2. 10545800 |
| H  | 2. 37233900  | 2. 28120200  | -2. 22820800 |
| H  | 3. 10427700  | 0. 68020600  | -2. 46433900 |
| C  | -1. 38269500 | -2. 27395700 | -0. 97511200 |
| O  | -2. 23622800 | -3. 04752400 | -1. 03561200 |
| C  | 1. 38167000  | -2. 27507000 | -0. 97363900 |
| O  | 2. 23473200  | -3. 04921100 | -1. 03315200 |
| H  | 0. 39594800  | -0. 29991300 | -2. 52138700 |
| O  | 0. 00054800  | -1. 90306600 | 2. 72160700  |
| Ru | -0. 00021600 | -0. 95878100 | -0. 72843000 |

### 7/2TS

|    |              |              |              |
|----|--------------|--------------|--------------|
| Si | -2. 97691900 | 1. 26880200  | 0. 01570900  |
| Si | 2. 97688100  | 1. 26854300  | 0. 01645800  |
| O  | 0. 00020600  | 2. 08602600  | -1. 23219700 |
| O  | 2. 28352300  | -2. 87454800 | -1. 28408900 |
| O  | -2. 28151800 | -2. 87808100 | -1. 28123100 |
| C  | 0. 00006100  | 1. 32271100  | -0. 17227300 |
| C  | -1. 21021000 | 0. 69298000  | 0. 39038100  |
| C  | -0. 71413700 | -0. 27403800 | 1. 33626300  |
| C  | -1. 17386000 | -1. 16019700 | 2. 46170300  |
| H  | -1. 96048100 | -1. 87479000 | 2. 21101900  |
| H  | -1. 52520200 | -0. 53832000 | 3. 30395400  |
| C  | 1. 17304400  | -1. 16025400 | 2. 46197200  |
| H  | 1. 52404900  | -0. 53827900 | 3. 30428600  |
| H  | 1. 95975000  | -1. 87484300 | 2. 21157000  |
| C  | 0. 71355100  | -0. 27420900 | 1. 33636800  |
| C  | 1. 20998500  | 0. 69307300  | 0. 39079000  |
| C  | -3. 31635900 | 1. 26575900  | -1. 83958700 |
| H  | -3. 26109900 | 0. 25397700  | -2. 25667200 |
| H  | -2. 58163100 | 1. 88660800  | -2. 36167600 |
| H  | -4. 31677700 | 1. 66400000  | -2. 05049900 |
| C  | -3. 14838200 | 3. 02121700  | 0. 70818300  |
| H  | -2. 41726100 | 3. 68986800  | 0. 23962700  |
| H  | -2. 98323900 | 3. 04784800  | 1. 79200600  |
| H  | -4. 14841400 | 3. 42808100  | 0. 51364100  |
| C  | -4. 17244400 | 0. 09465400  | 0. 90158700  |
| H  | -5. 20867300 | 0. 40809200  | 0. 72393200  |
| H  | -4. 01898700 | 0. 08780700  | 1. 98771500  |
| H  | -4. 07954400 | -0. 93622500 | 0. 53881600  |
| C  | 3. 14864400  | 3. 02085100  | 0. 70912800  |
| H  | 4. 14887200  | 3. 42741400  | 0. 51496400  |
| H  | 2. 98314300  | 3. 04743100  | 1. 79289700  |

|    |              |              |              |
|----|--------------|--------------|--------------|
| H  | 2. 41789400  | 3. 68978300  | 0. 24039400  |
| C  | 3. 31654900  | 1. 26555200  | -1. 83879500 |
| H  | 2. 58151500  | 1. 88598100  | -2. 36095400 |
| H  | 3. 26188200  | 0. 25371600  | -2. 25582500 |
| H  | 4. 31677800  | 1. 66429500  | -2. 04964900 |
| C  | 4. 17193100  | 0. 09403700  | 0. 90250000  |
| H  | 5. 20825700  | 0. 40768800  | 0. 72579100  |
| H  | 4. 07940000  | -0. 93663400 | 0. 53904500  |
| H  | 4. 01767800  | 0. 08652900  | 1. 98851200  |
| C  | 1. 39814500  | -2. 16026500 | -1. 09545700 |
| C  | -1. 39703500 | -2. 16240600 | -1. 09372900 |
| H  | -0. 00218800 | 0. 03077900  | -2. 34849900 |
| H  | -0. 00141800 | 0. 95900000  | -2. 01765900 |
| O  | -0. 00046700 | -1. 89705600 | 2. 82926800  |
| Ru | -0. 00010500 | -0. 90704900 | -0. 70421100 |

### 6/8TS

|    |              |              |              |
|----|--------------|--------------|--------------|
| C  | 0. 77048100  | -0. 08719700 | 1. 33530300  |
| O  | -0. 33388300 | -0. 19283200 | 1. 89343200  |
| H  | -2. 30270200 | -0. 72007500 | -2. 19170600 |
| C  | 1. 58907800  | -1. 22371100 | 0. 78836200  |
| C  | 2. 78506400  | -0. 62410200 | 0. 32562200  |
| C  | 4. 19390500  | -0. 95972500 | -0. 07902800 |
| H  | 4. 29041100  | -1. 70004600 | -0. 87566300 |
| H  | 4. 75371100  | -1. 32005000 | 0. 80162000  |
| C  | 4. 04082100  | 1. 37807900  | 0. 05722100  |
| H  | 4. 55566500  | 1. 70324800  | 0. 97800700  |
| H  | 4. 03459700  | 2. 21150200  | -0. 64787400 |
| C  | 2. 69035400  | 0. 81806800  | 0. 40883200  |
| C  | 1. 43085400  | 1. 20013700  | 0. 93141600  |
| Si | 1. 08696000  | -3. 04023100 | 0. 99337300  |
| C  | 0. 89793000  | -3. 37673900 | 2. 84441700  |
| H  | 1. 84209200  | -3. 22915300 | 3. 38246700  |
| H  | 0. 56821900  | -4. 40724300 | 3. 02555500  |
| H  | 0. 15413800  | -2. 69933200 | 3. 27751500  |
| C  | 2. 45763500  | -4. 12572400 | 0. 26296800  |
| H  | 3. 41754900  | -3. 97806800 | 0. 77292500  |
| H  | 2. 60706800  | -3. 93508900 | -0. 80667600 |
| H  | 2. 19497300  | -5. 18569900 | 0. 36841100  |
| C  | -0. 54290000 | -3. 35083800 | 0. 08943200  |
| H  | -0. 39418300 | -3. 40166400 | -0. 99573400 |
| H  | -1. 27087700 | -2. 55594100 | 0. 28503300  |
| H  | -0. 98586900 | -4. 30346400 | 0. 40615200  |

|    |              |              |              |
|----|--------------|--------------|--------------|
| Si | 0. 71000000  | 2. 90333000  | 1. 34670000  |
| C  | 0. 49870800  | 2. 99813100  | 3. 22320900  |
| H  | 0. 05239800  | 3. 95495900  | 3. 52101400  |
| H  | 1. 45917300  | 2. 90192200  | 3. 74380100  |
| H  | -0. 15610100 | 2. 19300500  | 3. 57330000  |
| C  | 1. 93215600  | 4. 22582200  | 0. 75597400  |
| H  | 1. 54428900  | 5. 22609100  | 0. 98547800  |
| H  | 2. 09133400  | 4. 18196200  | -0. 32819500 |
| H  | 2. 90871000  | 4. 13695500  | 1. 24762700  |
| C  | -0. 95013700 | 3. 12176800  | 0. 47257600  |
| H  | -1. 47181200 | 4. 01023900  | 0. 85008100  |
| H  | -1. 60450100 | 2. 25580400  | 0. 62082600  |
| H  | -0. 81377100 | 3. 25349900  | -0. 60765900 |
| C  | 1. 49090500  | -1. 21573100 | -2. 46146400 |
| O  | 1. 75225600  | -2. 02917800 | -3. 23739600 |
| C  | 1. 28744700  | 1. 55678500  | -2. 29918400 |
| O  | 1. 41680500  | 2. 48371300  | -2. 97469800 |
| H  | -2. 09565600 | -0. 82643200 | -2. 89925700 |
| C  | -3. 81405800 | -0. 57745600 | 1. 07922500  |
| H  | -3. 84866800 | -0. 02374300 | 2. 03251800  |
| H  | -3. 79542700 | -1. 64855700 | 1. 33679300  |
| O  | -2. 65550700 | -0. 20889800 | 0. 34411300  |
| H  | -1. 89296600 | -0. 21391000 | 0. 95629000  |
| O  | 4. 73385700  | 0. 28104300  | -0. 55166500 |
| Ru | 1. 21764800  | 0. 08151200  | -1. 07924400 |
| C  | -5. 06659300 | -0. 27822200 | 0. 28429000  |
| C  | -6. 23470800 | -1. 01549300 | 0. 51435300  |
| C  | -5. 09575000 | 0. 75749100  | -0. 65653200 |
| C  | -7. 41266000 | -0. 71975400 | -0. 17282500 |
| H  | -6. 22099600 | -1. 83133900 | 1. 23474600  |
| C  | -6. 27100500 | 1. 04936600  | -1. 35138800 |
| H  | -4. 18888300 | 1. 32215000  | -0. 84532800 |
| C  | -7. 43392400 | 0. 31494600  | -1. 11057500 |
| H  | -8. 31002700 | -1. 30339800 | 0. 01665400  |
| H  | -6. 27765500 | 1. 85283500  | -2. 08385900 |
| H  | -8. 34803000 | 0. 54293000  | -1. 65266500 |

## 8

|   |              |             |              |
|---|--------------|-------------|--------------|
| C | 0. 67649000  | 0. 05096600 | -1. 35432700 |
| O | -0. 38427800 | 0. 03971900 | -1. 99533300 |
| H | -0. 70213600 | 0. 20346700 | 1. 31335300  |
| C | 1. 35989000  | 1. 25776100 | -0. 77333400 |
| C | 2. 64376200  | 0. 78969300 | -0. 35204500 |

|    |              |              |              |
|----|--------------|--------------|--------------|
| C  | 4. 03422900  | 1. 27766000  | -0. 04094800 |
| H  | 4. 10816100  | 2. 03672700  | 0. 74002500  |
| H  | 4. 49934600  | 1. 67602800  | -0. 95941700 |
| C  | 4. 11471000  | -1. 06281800 | -0. 15615300 |
| H  | 4. 60369200  | -1. 33772300 | -1. 10702500 |
| H  | 4. 24054100  | -1. 88845000 | 0. 54695300  |
| C  | 2. 69438500  | -0. 64226800 | -0. 42777000 |
| C  | 1. 44719000  | -1. 15570300 | -0. 89191200 |
| Si | 0. 71339000  | 3. 02218900  | -1. 01937800 |
| C  | 0. 49139000  | 3. 30143000  | -2. 87678400 |
| H  | 1. 44476800  | 3. 22865700  | -3. 41416900 |
| H  | 0. 06950900  | 4. 29357700  | -3. 07956900 |
| H  | -0. 18615900 | 2. 54826600  | -3. 29255600 |
| C  | 1. 99682600  | 4. 23399000  | -0. 32664400 |
| H  | 2. 95953700  | 4. 15833500  | -0. 84699600 |
| H  | 2. 17587200  | 4. 07824800  | 0. 74409000  |
| H  | 1. 64419400  | 5. 26574700  | -0. 44859700 |
| C  | -0. 92968300 | 3. 23695800  | -0. 11149000 |
| H  | -0. 77300300 | 3. 31440200  | 0. 97140800  |
| H  | -1. 60202400 | 2. 38998700  | -0. 28833000 |
| H  | -1. 43865700 | 4. 15259800  | -0. 43760100 |
| Si | 0. 90514500  | -2. 92477800 | -1. 29791000 |
| C  | 0. 83172100  | -3. 09065800 | -3. 18101200 |
| H  | 0. 48376300  | -4. 08815700 | -3. 47658200 |
| H  | 1. 81574700  | -2. 93253300 | -3. 63887300 |
| H  | 0. 14240000  | -2. 35013900 | -3. 60060000 |
| C  | 2. 18827200  | -4. 12924900 | -0. 59258800 |
| H  | 1. 88839700  | -5. 16366600 | -0. 80178600 |
| H  | 2. 29223500  | -4. 03601300 | 0. 49502900  |
| H  | 3. 17856800  | -3. 98356400 | -1. 04155700 |
| C  | -0. 79079500 | -3. 25631400 | -0. 53442000 |
| H  | -1. 22611600 | -4. 18081700 | -0. 93373000 |
| H  | -1. 48723800 | -2. 43612200 | -0. 74020100 |
| H  | -0. 71904100 | -3. 36804900 | 0. 55438600  |
| C  | 1. 50243200  | 1. 32160400  | 2. 44644100  |
| O  | 1. 73385600  | 2. 18083200  | 3. 17931600  |
| C  | 1. 70437800  | -1. 45064200 | 2. 34631200  |
| O  | 2. 06339600  | -2. 31518100 | 3. 01895000  |
| H  | -0. 60715600 | -0. 56943900 | 1. 45802700  |
| C  | -3. 90590800 | 0. 30984500  | -1. 15934700 |
| H  | -3. 98470300 | -0. 33932500 | -2. 04792200 |
| H  | -3. 93260800 | 1. 34917100  | -1. 52421600 |
| O  | -2. 69809600 | 0. 04200300  | -0. 46297600 |

|    |              |              |              |
|----|--------------|--------------|--------------|
| H  | -1. 96304100 | 0. 04383500  | -1. 11073300 |
| Ru | 1. 22423600  | -0. 04387100 | 1. 12176300  |
| O  | 4. 72413900  | 0. 10448100  | 0. 40995100  |
| C  | -5. 09767400 | 0. 06757500  | -0. 25846300 |
| C  | -6. 29088000 | 0. 76988200  | -0. 46671400 |
| C  | -5. 04508100 | -0. 88523800 | 0. 76558500  |
| C  | -7. 41387300 | 0. 52019100  | 0. 32351500  |
| H  | -6. 34044700 | 1. 52198600  | -1. 25193000 |
| C  | -6. 16469300 | -1. 13121100 | 1. 56224100  |
| H  | -4. 11820000 | -1. 42294400 | 0. 93582200  |
| C  | -7. 35370700 | -0. 43232500 | 1. 34285600  |
| H  | -8. 33173300 | 1. 07602100  | 0. 14919900  |
| H  | -6. 10812800 | -1. 87091800 | 2. 35714200  |
| H  | -8. 22464100 | -0. 62424700 | 1. 96418400  |

### 8/2TS

|    |              |              |              |
|----|--------------|--------------|--------------|
| C  | 0. 88501700  | 0. 03899400  | 1. 34928300  |
| O  | -0. 04646900 | -0. 08108300 | 2. 20357700  |
| H  | -1. 54768300 | 0. 02416500  | -0. 16427100 |
| C  | 1. 62094400  | -1. 08845700 | 0. 72716000  |
| C  | 2. 61769800  | -0. 47843200 | -0. 11100000 |
| C  | 3. 91259200  | -0. 79276700 | -0. 81199200 |
| H  | 3. 86991100  | -1. 59747700 | -1. 54913500 |
| H  | 4. 69061000  | -1. 04351800 | -0. 06917700 |
| C  | 3. 62511300  | 1. 53631000  | -0. 83826500 |
| H  | 4. 31638800  | 1. 98423300  | -0. 10325500 |
| H  | 3. 39252600  | 2. 29038000  | -1. 59318400 |
| C  | 2. 44281600  | 0. 93312800  | -0. 12559900 |
| C  | 1. 31841700  | 1. 30268000  | 0. 69100200  |
| Si | 1. 49684600  | -2. 88299700 | 1. 29750700  |
| C  | 2. 16721900  | -2. 97991800 | 3. 06607600  |
| H  | 3. 22248600  | -2. 68567300 | 3. 11629300  |
| H  | 2. 08569900  | -3. 99808900 | 3. 46661800  |
| H  | 1. 60137600  | -2. 31072800 | 3. 72412700  |
| C  | 2. 54934000  | -3. 96061500 | 0. 14638500  |
| H  | 3. 60827800  | -3. 67579800 | 0. 16816500  |
| H  | 2. 20661600  | -3. 90644300 | -0. 89377000 |
| H  | 2. 49157500  | -5. 01178000 | 0. 45537700  |
| C  | -0. 29052700 | -3. 49897700 | 1. 27884900  |
| H  | -0. 71823600 | -3. 47019600 | 0. 26987400  |
| H  | -0. 90864800 | -2. 87831800 | 1. 93552100  |
| H  | -0. 34724600 | -4. 53376000 | 1. 63908700  |
| Si | 0. 76717600  | 3. 04228100  | 1. 19961400  |

|    |              |              |              |
|----|--------------|--------------|--------------|
| C  | 0. 88037100  | 3. 15289600  | 3. 08493800  |
| H  | 0. 49746200  | 4. 11341200  | 3. 45122100  |
| H  | 1. 91596300  | 3. 05197100  | 3. 43189800  |
| H  | 0. 29643400  | 2. 34896300  | 3. 54533500  |
| C  | 1. 94752000  | 4. 29465600  | 0. 40156900  |
| H  | 1. 67223200  | 5. 31235700  | 0. 70551400  |
| H  | 1. 90090400  | 4. 26183300  | -0. 69380200 |
| H  | 2. 99031800  | 4. 13736600  | 0. 70198100  |
| C  | -0. 98999800 | 3. 44551400  | 0. 62874300  |
| H  | -1. 28535900 | 4. 43571400  | 0. 99911000  |
| H  | -1. 72333400 | 2. 71662000  | 0. 98688600  |
| H  | -1. 05366000 | 3. 46733300  | -0. 46570500 |
| C  | 0. 70655600  | -1. 44052100 | -2. 36685000 |
| O  | 0. 78305900  | -2. 33337100 | -3. 09580800 |
| C  | 0. 40555600  | 1. 31976400  | -2. 43359100 |
| O  | 0. 29561300  | 2. 17199000  | -3. 20477200 |
| H  | -1. 07667100 | -0. 22830200 | -0. 97062900 |
| C  | -3. 17689100 | -0. 79948400 | 1. 19526300  |
| H  | -3. 34461900 | -0. 80211000 | 2. 27859500  |
| H  | -2. 75332100 | -1. 76961600 | 0. 91383800  |
| O  | -2. 21191300 | 0. 25048300  | 0. 93244600  |
| H  | -1. 41043900 | 0. 16694800  | 1. 58250500  |
| O  | 4. 24184600  | 0. 42256100  | -1. 49789600 |
| Ru | 0. 66573600  | -0. 01822200 | -1. 09721800 |
| C  | -4. 45211500 | -0. 52940800 | 0. 43992800  |
| C  | -4. 96393400 | -1. 47816700 | -0. 45138100 |
| C  | -5. 14963600 | 0. 67159800  | 0. 63235500  |
| C  | -6. 15823900 | -1. 23882900 | -1. 13555300 |
| H  | -4. 42611000 | -2. 40996100 | -0. 61122600 |
| C  | -6. 33708400 | 0. 91544700  | -0. 05492000 |
| H  | -4. 75265800 | 1. 41727800  | 1. 31606600  |
| C  | -6. 84574000 | -0. 04122900 | -0. 93884800 |
| H  | -6. 54508300 | -1. 98465000 | -1. 82452700 |
| H  | -6. 86854400 | 1. 85062400  | 0. 09944500  |
| H  | -7. 77292600 | 0. 14925600  | -1. 47256100 |

## 9

|   |              |              |              |
|---|--------------|--------------|--------------|
| C | -1. 56850000 | -1. 44707900 | 0. 67693300  |
| O | -0. 63932900 | -2. 23751900 | 0. 92026400  |
| H | 0. 00632400  | 0. 50055300  | -1. 20331900 |
| C | -2. 00595800 | -0. 29419100 | 1. 52623000  |
| C | -3. 24185600 | 0. 14653200  | 0. 94883400  |
| C | -4. 49293400 | 0. 91256700  | 1. 28968700  |

|    |             |             |             |
|----|-------------|-------------|-------------|
| H  | -4.34202400 | 1.94156700  | 1.62115100  |
| H  | -5.05962800 | 0.37344200  | 2.06881700  |
| C  | -4.86071300 | -0.17535300 | -0.75591000 |
| H  | -5.53356400 | -1.03121500 | -0.57208700 |
| H  | -4.95607900 | 0.11895300  | -1.80287600 |
| C  | -3.46959700 | -0.52386700 | -0.29604800 |
| C  | -2.38306000 | -1.40240200 | -0.58680300 |
| Si | -1.29463300 | 0.06546800  | 3.24459700  |
| C  | -1.81963900 | -1.36072400 | 4.37698000  |
| H  | -2.91056700 | -1.42916200 | 4.46797100  |
| H  | -1.40981200 | -1.23385000 | 5.38685200  |
| H  | -1.45541900 | -2.31625100 | 3.98286100  |
| C  | -2.03313900 | 1.68766500  | 3.88952200  |
| H  | -3.12533400 | 1.63801900  | 3.97949100  |
| H  | -1.78492900 | 2.54203000  | 3.24965500  |
| H  | -1.63814800 | 1.90492500  | 4.88988400  |
| C  | 0.58621400  | 0.17193400  | 3.18286900  |
| H  | 0.93834900  | 0.97230200  | 2.52386600  |
| H  | 1.00653300  | -0.76583500 | 2.80514400  |
| H  | 0.99439900  | 0.34793400  | 4.18608900  |
| Si | -2.14312100 | -2.63489200 | -2.00252700 |
| C  | -2.45700300 | -4.37107200 | -1.31803900 |
| H  | -2.28412500 | -5.13696700 | -2.08418200 |
| H  | -3.48804700 | -4.48397000 | -0.96150000 |
| H  | -1.78643100 | -4.57333000 | -0.47584200 |
| C  | -3.39535300 | -2.24221200 | -3.37039800 |
| H  | -3.27309100 | -2.94213700 | -4.20640600 |
| H  | -3.26584400 | -1.23029400 | -3.77238600 |
| H  | -4.43038300 | -2.33694200 | -3.01950100 |
| C  | -0.38405800 | -2.50502000 | -2.68125200 |
| H  | -0.18147600 | -3.31744300 | -3.39044100 |
| H  | 0.36031500  | -2.56275500 | -1.87952500 |
| H  | -0.23390200 | -1.55693600 | -3.21164100 |
| C  | -1.54346000 | 2.60071200  | 0.17301300  |
| O  | -1.51109500 | 3.66025600  | 0.62374100  |
| C  | -2.17367500 | 1.40713300  | -2.24936700 |
| O  | -2.54058000 | 1.72394200  | -3.29575800 |
| H  | 0.31173000  | 0.76175000  | -0.50892700 |
| C  | 2.81125200  | -2.80189100 | 1.04460500  |
| H  | 2.43415600  | -3.82683300 | 0.90604500  |
| H  | 2.75758100  | -2.58001600 | 2.12054600  |
| O  | 1.99643300  | -1.89947800 | 0.29648800  |
| H  | 1.05135500  | -2.06579600 | 0.52594500  |



|    |              |              |              |
|----|--------------|--------------|--------------|
| C  | 3. 07498600  | 1. 21280800  | -0. 81800700 |
| H  | 2. 63928500  | 0. 89581100  | -1. 78095700 |
| H  | 4. 04269000  | 0. 69371400  | -0. 72757800 |
| O  | 2. 23327800  | 0. 85498300  | 0. 26897900  |
| H  | 2. 25556400  | -0. 12732100 | 0. 35977100  |
| C  | 4. 24540600  | -2. 71288900 | 0. 57607700  |
| C  | 5. 29800600  | -2. 77799200 | 1. 49571300  |
| C  | 4. 54458900  | -2. 59867900 | -0. 78842800 |
| C  | 6. 62559300  | -2. 74116100 | 1. 06429700  |
| H  | 5. 07774500  | -2. 85364400 | 2. 55844100  |
| C  | 5. 87036100  | -2. 55246300 | -1. 22084000 |
| H  | 3. 73115900  | -2. 53958100 | -1. 50518200 |
| C  | 6. 91534300  | -2. 62689200 | -0. 29613500 |
| H  | 7. 43149500  | -2. 79105100 | 1. 79183500  |
| H  | 6. 08872100  | -2. 46068400 | -2. 28178200 |
| H  | 7. 94766100  | -2. 59149900 | -0. 63398000 |
| C  | 3. 29672900  | 2. 70917300  | -0. 83992000 |
| C  | 3. 33378300  | 3. 44619200  | 0. 35033900  |
| C  | 3. 50715000  | 3. 37524700  | -2. 05339600 |
| C  | 3. 57814100  | 4. 82017000  | 0. 32500800  |
| H  | 3. 16070700  | 2. 93351300  | 1. 29095600  |
| C  | 3. 75963800  | 4. 74801300  | -2. 08032100 |
| H  | 3. 47140000  | 2. 81537700  | -2. 98615300 |
| C  | 3. 79476100  | 5. 47568400  | -0. 88925200 |
| H  | 3. 59953900  | 5. 38056100  | 1. 25641700  |
| H  | 3. 91919900  | 5. 24948800  | -3. 03152900 |
| H  | 3. 98428800  | 6. 54576200  | -0. 90760500 |
| O  | -5. 22833900 | 0. 94499000  | 0. 05876400  |
| Ru | -1. 70190500 | 0. 80119800  | -0. 48757000 |

## 9/2TS

|   |             |              |              |
|---|-------------|--------------|--------------|
| C | 1. 49931100 | -1. 43036900 | 0. 56550900  |
| O | 0. 50888800 | -2. 10713000 | 0. 94088400  |
| H | 0. 02618200 | 1. 15049100  | -0. 18133200 |
| C | 2. 08400000 | -1. 36741400 | -0. 80258700 |
| C | 3. 31680100 | -0. 63727600 | -0. 64902000 |
| C | 4. 64606700 | -0. 42536600 | -1. 32535200 |
| H | 4. 60617700 | -0. 01590400 | -2. 33685100 |
| H | 5. 20689200 | -1. 37634400 | -1. 35851800 |
| C | 4. 79649900 | 0. 45463600  | 0. 84603000  |
| H | 5. 40279200 | -0. 23047100 | 1. 46496000  |
| H | 4. 85099900 | 1. 45296100  | 1. 28578000  |
| C | 3. 41179200 | -0. 10903700 | 0. 66979600  |

|    |              |              |              |
|----|--------------|--------------|--------------|
| C  | 2. 24328000  | -0. 46199300 | 1. 42296700  |
| Si | 1. 56001200  | -2. 44381500 | -2. 26358600 |
| C  | 1. 66897200  | -4. 25571300 | -1. 72008000 |
| H  | 2. 70007600  | -4. 53959900 | -1. 47663100 |
| H  | 1. 31390700  | -4. 93209800 | -2. 50749500 |
| H  | 1. 05900200  | -4. 42243600 | -0. 82533300 |
| C  | 2. 75904800  | -2. 13039800 | -3. 70012200 |
| H  | 3. 79429100  | -2. 38374400 | -3. 44208300 |
| H  | 2. 73818700  | -1. 08434100 | -4. 02904000 |
| H  | 2. 47975500  | -2. 74799100 | -4. 56297300 |
| C  | -0. 19325800 | -2. 06333400 | -2. 86082600 |
| H  | -0. 28338000 | -1. 02471400 | -3. 19981700 |
| H  | -0. 94447300 | -2. 23182700 | -2. 08255600 |
| H  | -0. 44295500 | -2. 71200100 | -3. 71074500 |
| Si | 1. 82119800  | -0. 16777400 | 3. 23449800  |
| C  | 2. 07999500  | -1. 78502400 | 4. 18558400  |
| H  | 1. 78937300  | -1. 68377300 | 5. 23875700  |
| H  | 3. 12868200  | -2. 10505700 | 4. 15851200  |
| H  | 1. 47542400  | -2. 58218400 | 3. 73899300  |
| C  | 2. 95630400  | 1. 18094800  | 3. 93230600  |
| H  | 2. 70988900  | 1. 38035100  | 4. 98278800  |
| H  | 2. 85429800  | 2. 12624600  | 3. 38638900  |
| H  | 4. 01204600  | 0. 88483900  | 3. 89875400  |
| C  | 0. 01200600  | 0. 36963000  | 3. 38992500  |
| H  | -0. 30629200 | 0. 41024500  | 4. 43891900  |
| H  | -0. 62813100 | -0. 34641800 | 2. 86264300  |
| H  | -0. 14334500 | 1. 36012100  | 2. 94650500  |
| C  | 1. 72235200  | 1. 54098400  | -2. 17814300 |
| O  | 1. 76375700  | 1. 87164300  | -3. 28501200 |
| C  | 2. 02679000  | 2. 62256700  | 0. 35238800  |
| O  | 2. 25375800  | 3. 64388300  | 0. 84470600  |
| H  | -0. 85225800 | 0. 83843200  | -0. 39622300 |
| C  | -2. 79588800 | -2. 60136400 | 1. 14971600  |
| H  | -2. 57962600 | -2. 16285500 | 2. 13398400  |
| H  | -2. 55968800 | -3. 67341300 | 1. 21329700  |
| O  | -1. 96758000 | -2. 01645500 | 0. 14061300  |
| H  | -1. 00175300 | -2. 14518600 | 0. 38865900  |
| C  | -2. 90913400 | 1. 25517200  | 0. 37831600  |
| H  | -2. 40126500 | 1. 36059200  | 1. 34433400  |
| H  | -3. 81813200 | 0. 66245000  | 0. 52794500  |
| O  | -2. 07041300 | 0. 48563100  | -0. 52687100 |
| H  | -2. 09352400 | -0. 50271600 | -0. 25678200 |
| C  | -4. 25318700 | -2. 40561900 | 0. 80076100  |

|    |             |             |             |
|----|-------------|-------------|-------------|
| C  | -5.18451800 | -2.07567300 | 1.79276400  |
| C  | -4.69863200 | -2.57666600 | -0.51777600 |
| C  | -6.53820800 | -1.93012400 | 1.47958800  |
| H  | -4.84909000 | -1.93343600 | 2.81797900  |
| C  | -6.04869400 | -2.42329300 | -0.83310500 |
| H  | -3.97963000 | -2.82240100 | -1.29349900 |
| C  | -6.97309100 | -2.10255700 | 0.16481800  |
| H  | -7.24886100 | -1.67476400 | 2.26110400  |
| H  | -6.38076200 | -2.55617600 | -1.85944700 |
| H  | -8.02467600 | -1.98478400 | -0.08242800 |
| C  | -3.21747500 | 2.60319600  | -0.21834600 |
| C  | -2.95132400 | 3.77421100  | 0.49884100  |
| C  | -3.79596700 | 2.69860600  | -1.49188800 |
| C  | -3.26532000 | 5.02394100  | -0.04078600 |
| H  | -2.49552400 | 3.70952900  | 1.48429200  |
| C  | -4.10170700 | 3.94504100  | -2.03498700 |
| H  | -3.99506800 | 1.79251000  | -2.05755600 |
| C  | -3.83997700 | 5.11096600  | -1.30892600 |
| H  | -3.05299700 | 5.92589100  | 0.52659600  |
| H  | -4.54613700 | 4.00858700  | -3.02456800 |
| H  | -4.08028400 | 6.08208400  | -1.73310300 |
| Ru | 1.72801600  | 0.89252500  | -0.38578600 |
| O  | 5.31774200  | 0.52598000  | -0.48764700 |

**(PhCH<sub>2</sub>OH)<sub>2</sub>**

|   |             |             |             |
|---|-------------|-------------|-------------|
| H | 1.87201200  | 3.27665600  | 0.55016800  |
| C | -1.27254200 | 0.67951100  | 0.91770300  |
| H | -1.43571700 | 1.26273800  | 1.84111900  |
| H | -0.65135600 | -0.18635100 | 1.20350600  |
| O | -0.62673900 | 1.46556800  | -0.06633200 |
| C | 2.85843100  | 1.87131300  | -0.41216700 |
| H | 3.82036300  | 2.39373600  | -0.32703400 |
| H | 2.42094600  | 2.11980500  | -1.38951100 |
| O | 1.97356300  | 2.31473500  | 0.64133900  |
| H | 0.24835800  | 1.72924200  | 0.28661900  |
| C | 3.06644800  | 0.38343700  | -0.29355500 |
| C | 2.03059100  | -0.50310300 | -0.62235500 |
| C | 4.28980800  | -0.13247000 | 0.14647400  |
| C | 2.22075600  | -1.87982300 | -0.50956800 |
| H | 1.07143300  | -0.10778800 | -0.94777200 |
| C | 4.48352900  | -1.51100700 | 0.25311500  |
| H | 5.09711500  | 0.54884000  | 0.40597500  |
| C | 3.44829500  | -2.38684300 | -0.07492500 |

|                      |              |              |              |
|----------------------|--------------|--------------|--------------|
| H                    | 1. 41145500  | -2. 55813300 | -0. 76636400 |
| H                    | 5. 44031400  | -1. 89853200 | 0. 59288900  |
| H                    | 3. 59640800  | -3. 46046000 | 0. 00663200  |
| C                    | -2. 60951200 | 0. 18341100  | 0. 40752600  |
| C                    | -3. 37787200 | -0. 67847200 | 1. 20146300  |
| C                    | -3. 10331300 | 0. 57223300  | -0. 84054400 |
| C                    | -4. 61580200 | -1. 14154700 | 0. 75888100  |
| H                    | -3. 00287400 | -0. 98997500 | 2. 17521200  |
| C                    | -4. 34355500 | 0. 10756000  | -1. 28610700 |
| H                    | -2. 50700900 | 1. 23747500  | -1. 45485500 |
| C                    | -5. 10410300 | -0. 74885700 | -0. 49027200 |
| H                    | -5. 19901900 | -1. 81006800 | 1. 38733200  |
| H                    | -4. 71521800 | 0. 41764900  | -2. 25982900 |
| H                    | -6. 06875500 | -1. 10932100 | -0. 83816400 |
| <b>H<sub>2</sub></b> |              |              |              |
| H                    | 0. 00000000  | 0. 00000000  | 0. 37139400  |
| H                    | 0. 00000000  | 0. 00000000  | -0. 37139400 |
